# Supplementary material for: Multi-tasking hydrated ionic liquids as sustainable media for the processing of waste human hair: a biorefinery approach
Source: Royal Society of Chemistry journal article supplement (doi:10.1039/c9gc00542k), 2019-01-01
Supplement: c9gc00542k1.pdf [file c9gc00542k1.pdf]

## Multi tasking hydrated ionic liquid as a sustainable media for the processing of waste human hair: A biorefinery approach

Nripat Singh,<sup>a,b</sup> & Kamalesh Prasad \*<sup>a,b</sup>

<sup>a</sup> Natural Products & Green Chemistry Division, CSIR-Central Salt & Marine Chemicals Research Institute, G. B Marg, Bhavnagar-364002 (Gujarat), India. (Tel : +91-278-2567760 ; Fax : +91-278-2567562 ; e-mail : [kamlesh@csmcri.res.in](mailto:kamlesh@csmcri.res.in) / [drkamaleshp@gmail.com](mailto:drkamaleshp@gmail.com))

<sup>b</sup> AcSIR- Central Salt & Marine Chemicals Research Institute, G. B Marg, Bhavnagar-364002 (Gujarat), India.

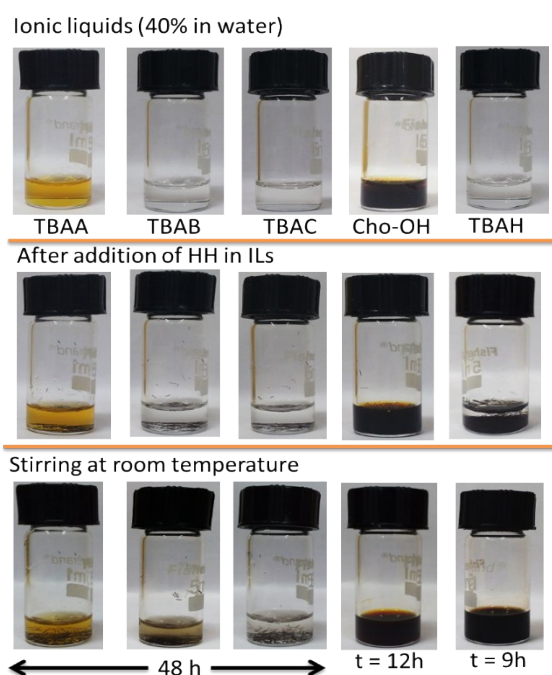

**Figure S1:** Optical images of dissolution of Human hair in ILs

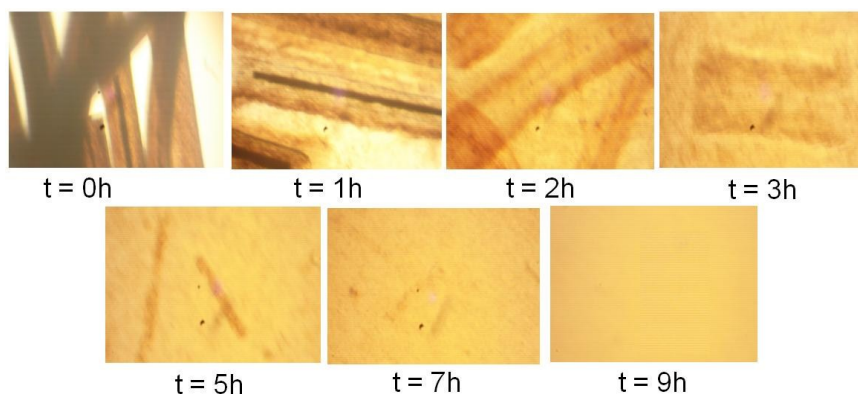

**Figure S2:** Microscopic images of HH (25 wt%) in TBAH IL taking at the time of dissolution process with different time interval

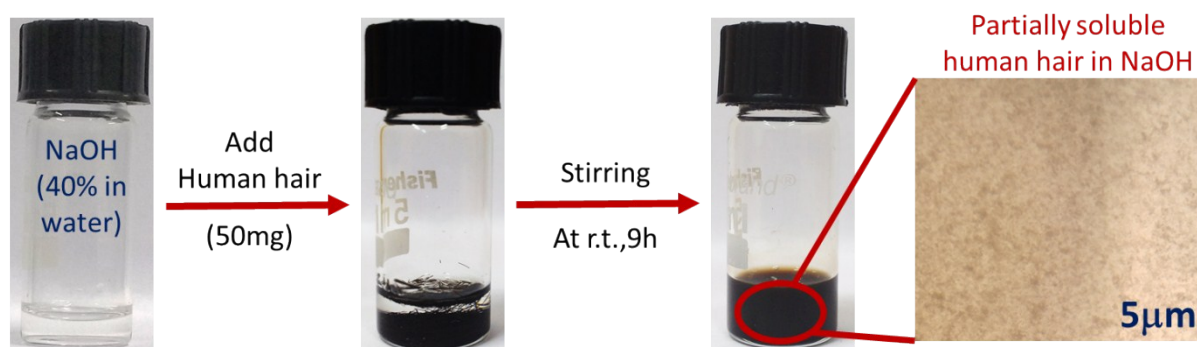

**Figure S3** : Dissolution of waste human hair in NaOH (40% Water) at 5% w/w at room temperature.

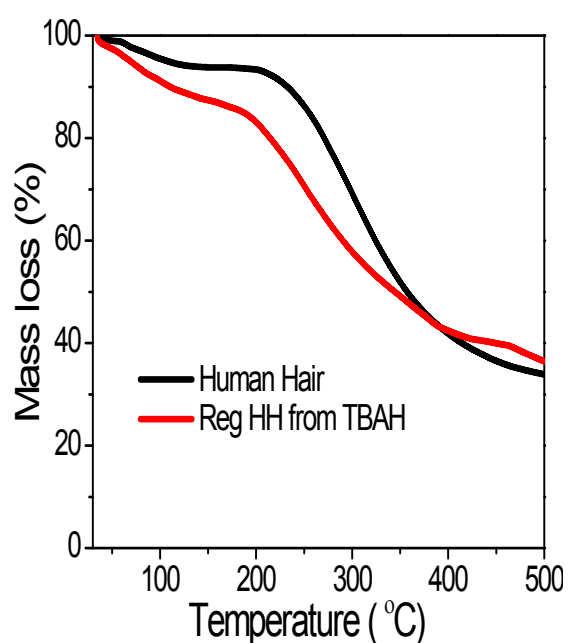

**Figure S4:** Thermo gravimetric analysis of Human hair and regenerated Human hair from TBAH

**Table S1:** Elemental analyses of human hair, extracted keratin and melanin and comparison with standards

| Entry | Sample                            | %C    | %H   | %N    | %S   |
|-------|-----------------------------------|-------|------|-------|------|
| 1.    | Human Hair                        | 43.56 | 6.39 | 14.42 | 4.14 |
| 2.    | Extracted Keratin from Human Hair | 44.12 | 6.49 | 13.10 | 2.18 |
| 3.    | Std Wool keratin                  | 41.90 | 6.80 | 12.93 | 2.05 |

|    |                                         |       |       |       |      |
|----|-----------------------------------------|-------|-------|-------|------|
| 4. | Extracted crude melanin from Human hair | 45.28 | 6.03  | 12.90 | 3.13 |
| 5. | Std Melanin                             | 47.64 | 4.044 | 5.56  | 3.45 |

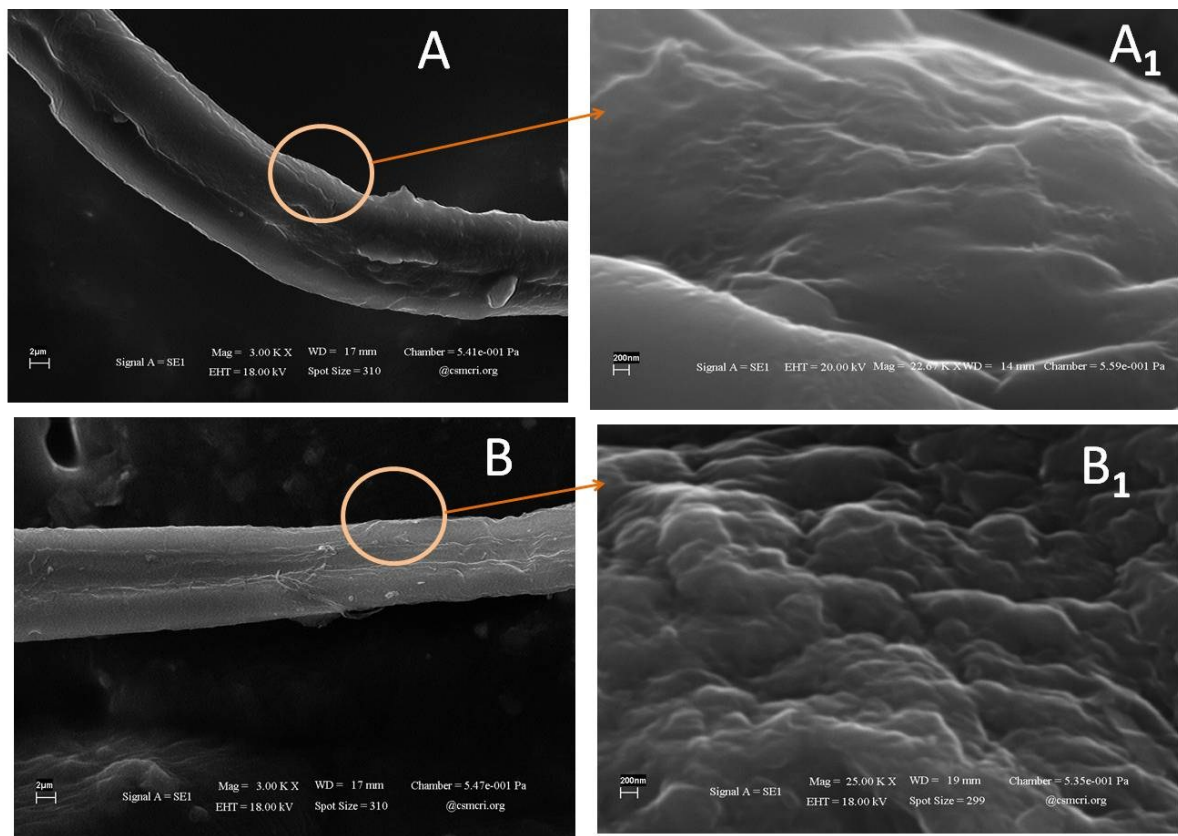

**Figure S5 :** SEM images of human hair before treatment (A) at lower magnification and (A<sub>1</sub>) at higher magnification and regenerated human hair from TBAH (B) at lower magnification and (B<sub>1</sub>) at higher magnification
